# Supplementary material for: Outcome of corticosteroid administration in autoimmune pulmonary alveolar proteinosis: a retrospective cohort study
Source: Springer Nature journal article supplement (doi:10.1186/s12890-015-0085-0), 2015-08-11
Supplement: MOESM1 [file 9751882]

Supplemental Table 1

Disease severity score (DSS) for each case of pre- and post- start of the corticosteroids administration.

| Case No. | Duration (mo.) | Disease severity score (DSS) |                    |                    |                    |                    |                  |                   |                   |  |
|----------|----------------|------------------------------|--------------------|--------------------|--------------------|--------------------|------------------|-------------------|-------------------|--|
|          |                | Pre.                         | 1 mo.(0.5-1.5 mo.) | 2 mo.(1.5-2.5 mo.) | 3 mo.(2.5-4.5 mo.) | 6 mo.(4.5-7.5 mo.) | 12 mo.(9-15 mo.) | 18 mo.(15-21 mo.) | 24 mo.(21-27 mo.) |  |
| 1        | 0.82           | 2                            | 3                  | 5                  | 2 *                | 1                  | 1                | 1                 | N/A               |  |
| 2        | 0.99           | 3                            | 4                  | 5                  | 5                  | 3                  | 2                | 1                 | 1                 |  |
| 3        | 1.28           | 4                            | 5                  | †                  | -                  | -                  | -                | -                 | -                 |  |
| 4        | 1.71           | 3                            | 4                  | 4 *                | 5                  | 5                  | 2                | 2                 | N/A               |  |
| 5        | 2.04           | 2                            | 3                  | 5                  | N/A                | 3                  | 1                | 1                 | 1                 |  |
| 6        | 2.17           | 1                            | 1                  | 4                  | 1                  | 1                  | 1                | 1                 | 1                 |  |
| 7        | 2.27           | 2                            | 2                  | 2                  | 2                  | N/A                | N/A              | N/A               | N/A               |  |
| 8        | 2.27           | 2                            | 2                  | 5                  | †                  | -                  | -                | -                 | -                 |  |
| 9        | 2.27           | 3                            | 5                  | 5 #                | 3 #                | 1 #                | 1                | 1                 | 1                 |  |
| 10       | 2.70           | 1                            | 1                  | 1                  | 4                  | 1                  | 1                | 1                 | 1                 |  |
| 11       | 3.88           | 1                            | 1                  | 1                  | 1                  | 1                  | 1                | 1                 | 1                 |  |
| 12       | 4.31           | 2                            | 2                  | 2                  | 3                  | 2                  | 2                | 1                 | 1                 |  |
| 13       | 4.41           | 1                            | 1                  | 1                  | 1                  | 2                  | 2                | N/A               | N/A               |  |
| 14       | 4.47           | 4                            | 5                  | 5 *                | 3                  | 1                  | 1                | 1                 | 1                 |  |
| 15       | 5.39           | 4                            | 4                  | N/A                | N/A                | 3 #                | 1                | 3                 | N/A               |  |
| 16       | 6.28           | 3                            | N/A                | N/A                | N/A                | 4 *                | 1                | N/A               | N/A               |  |
| 17       | 6.58           | 3                            | N/A                | N/A                | 4 *                | 3                  | 2                | 2                 | 3                 |  |
| 18       | 7.10           | 1                            | 1                  | 1                  | 3                  | 3                  | 2                | 2                 | 2                 |  |
| 19       | 7.23           | 2                            | 3                  | 3                  | 3 *                | 2                  | 1                | 1                 | N/A               |  |
| 20       | 7.33           | 2                            | 2                  | 2                  | 4                  | 3 *                | 1                | 1                 | 2                 |  |
| 21       | 8.05           | 5                            | 5                  | 5                  | 4                  | 4                  | 1                | 1                 | 1                 |  |
| 22       | 8.12           | 1                            | 1                  | 1                  | 1                  | 2                  | 1                | 1                 | 1                 |  |
| 23       | 9.07           | 4                            | 2                  | 1                  | 2                  | 4                  | 5 *              | 2                 | 2                 |  |
| 24       | 10.06          | 1                            | 1                  | 1                  | 1                  | 1                  | 3 *              | 2                 | 2                 |  |
| 25       | 10.52          | 2                            | 2                  | N/A                | 2                  | 3                  | 5 *              | 1                 | 1                 |  |
| 26       | 11.90          | 2                            | 2                  | 3                  | N/A                | 4                  | 5                | N/A               | N/A               |  |
| 27       | 15.91          | 1                            | 1                  | 1                  | 1                  | 1                  | 3                | 2                 | 1                 |  |
| 28       | 16.01          | 2                            | 3                  | 3                  | 3                  | 5                  | 5                | 5                 | N/A               |  |
| 29       | 16.08          | 2                            | 2                  | 2                  | 2                  | 2                  | 2                | 2                 | 2                 |  |
| 30       | 32.98          | 1                            | 1                  | 1                  | 1                  | 1                  | 1                | 1                 | 1                 |  |
| 31       | 48.85          | 2                            | 2                  | 2                  | 2                  | 2                  | 2                | 2                 | 2                 |  |

mo.: month; Pre.: Pre-administration of corticosteroids; \*: Whole lung lavage;

#: Inhalation of granulocyte/macrophage colony-stimulating factor; N/A: Not available; †: deceased.

An area indicated by the blue shows duration of corticosteroids administration.
